# Supplementary material for: Risk Profiles and Antithrombotic Treatment of Patients Newly Diagnosed with Atrial Fibrillation at Risk of Stroke: Perspectives from the International, Observational, Prospective GARFIELD Registry
Source: PLoS One. 2013 May 21;8(5):e63479. doi: 10.1371/journal.pone.0063479 (PMC3660389; doi:10.1371/journal.pone.0063479)
Supplement: Table S1 — Patient baseline characteristics: retrospective (part prospective) validation group and prospective group. (DOC) [file pone.0063479.s004.doc]

**Table S1. Baseline characteristics of the study population: retrospective and prospective cohorts.**

| **Variable** | **Retrospective cohort**  **(n = 5,089)** | **Prospective cohort**  **(n = 5,525)** | ***p* value**a |
| --- | --- | --- | --- |
| Age, mean (SD), years | 70.6±10.8 | 69.8±11.5 | <0.001 |
| Age group, *n* (%) |  |  |  |
| >65 years | 3,581 (70.4) | 3,793 (68.7) | 0.055 |
| ≥75 years | 2,010 (39.5) | 2,081 (37.7) | 0.053 |
| 65–74 years | 1,702 (33.4) | 1,838 (33.3) | 0.85 |
| Women, *n* (%) | 2,168 (42.6) | 2,412 (43.7) | 0.27 |
| BMI,b mean (SD), kg/m2 | 27.7±5.1 | 27.3±5.5 | <0.001 |
| Smoking status (current/previous),c *n* (%) | 1,699 (35.9) | 1,805 (34.7) | 0.21 |
| Pulse,d mean (SD), bpm | 84.5±23.9 | 88.5±25.8 | <0.001 |
| Medical history, *n* (%) |  |  |  |
| Congestive heart failuree | 1,075 (21.1) | 1,154 (20.9) | 0.76 |
| Hypercholesterolemiae | 2,127 (41.8) | 2,032 (36.8) | <0.001 |
| Hypertensione | 4,002 (78.7) | 4,247 (76.9) | 0.025 |
| Acute coronary syndrome | 501 (9.8) | 559 (10.1) | 0.64 |
| Coronary artery diseasee | 969 (19.1) | 1,066 (19.3) | 0.75 |
| Family history of cardiac diseasea,f,g | 973 (19.1) | 967 (17.5) | 0.020 |
| Diabetes mellitusg | 1,106 (21.8) | 1,224 (22.2) | 0.61 |
| Strokee history | 551 (10.8) | 475 (8.6) | <0.001 |
| Stroke or TIAe history | 798 (15.7) | 730 (13.2) | <0.001 |
| LVEF <40%b,h | 280 (9.9) | 306 (9.2) | 0.39 |
| Chronic renal diseasec,i |  |  |  |
| Mild renal dysfunction (GFR 60–89 mL/min) | 709 (19.4) | 793 (19.8) | 0.71 |
| Moderate renal dysfunction (GFR 30–59 mL/min) | 451 (12.4) | 420 (10.5) | 0.009 |
| Severe renal dysfunction or renal failure (GFR <30 mL/min) | 79 (2.2) | 75 (1.9) | 0.36 |
| Cirrhosise | 16 (0.3) | 39 (0.7) | 0.005 |
| Peripheral vascular/artery diseasee | 361 (7.1) | 382 (6.9) | 0.71 |
| Carotid occlusive diseasee | 177 (3.5) | 191 (3.5) | 0.95 |
| Other thromboembolismd,e,j | 82 (1.6) | 68 (1.2) | 0.097 |
| Systemic embolisme | 45 (0.9) | 35 (0.6) | 0.14 |
| History of bBleedinge | 196 (3.9) | 172 (3.1) | 0.037 |
| Heavy alcohol consumptione,k | 85 (1.9) | 130 (2.6) | 0.020 |
| PE or DVTe history | 142 (2.8) | 162 (2.9) | 0.66 |
| Risk score, mean ± SD |  |  |  |
| CHADS2 | 2.0 (1.2) | 1.9 (1.2) | 0.001 |
| CHA2DS2-VASc | 3.3 (1.6) | 3.2 (1.6) | 0.006 |
| HAS-BLED | 1.1 (0.8) | 1.1 (0.8) | 0.056 |

Abbreviations: BMI, body mass index; DVT, deep vein thrombosis; GFR, glomerular filtration rate; LVEF, Left ventricular ejection fraction; PE, pulmonary embolism; SD, standard deviation; TIA, transient ischemic attack.

aRetrospective vs. prospective cohorts. By Chi-squared test for categorical variables, or unpaired t-test for continuous variables.

bData not available for 933 and 678 patients in the retrospective and prospective cohorts, respectively.

cData not available for 352 and 319 patients in the retrospective and prospective cohorts, respectively.

dData not available for 840 and 532 patients in the retrospective and prospective cohorts, respectively.

eData not available for 4 and 2 patients in the retrospective and prospective cohorts, respectively.

fFirst-degree relative with premature cardiac history (age <55 years [male], <65 years [female]).

gData not available for 5 and 2 patients in the retrospective and prospective cohorts, respectively.

hData not available for 2,247 and 2,201 patients in the retrospective and prospective cohorts, respectively.

iData not available for 1,440 and 1,514 patients in the retrospective and prospective cohorts, respectively.

jFor example, central venous thrombosis, retinal occlusion.

kInvestigator defined; data not available for 556 and 492 patients in the retrospective and prospective cohorts, respectively.
